# Supplementary material for: The Impact of Respiratory Symptoms on the Risk of Serious Bacterial Infection in Febrile Infants < 60 Days Old
Source: MDPI journal article supplement (doi:10.3390/jcm12144636), 2023-07-12
Supplement: s1 [file s1]

**Table S1. Comparison of febrile infants younger than 28 days of age**

|                 | <b>Fever only</b> | <b>Fever &amp; Resp, virus<br/>(NA)</b> | <b>Fever &amp; Resp,<br/>virus (-)</b> | <b>Fever &amp; Resp,<br/>virus (+)</b> |
|-----------------|-------------------|-----------------------------------------|----------------------------------------|----------------------------------------|
| week 1          | 5/45 (11.1%)      | NA                                      | 1/23 (4.3%)                            | NA                                     |
| week 2          | 18/133 (13.5%)    | 2/17 (11.8%)                            | 12/81 (14.8%)                          | 2/31 (6.5%)                            |
| week 3          | 36/242 (14.9%)    | 9/44 (20.5%)                            | 14/153 (9.2%)                          | 3/65 (4.6%)                            |
| week 4          | 14/140 (10%)      | 4/64 (6.3%)                             | 8/123 (6.5%)                           | 2/66 (3%)                              |
| Total           | 73/560 (13%)      | 15/125 (12%)                            | 35/380 (9.2%)                          | 7/162 (4.3%)                           |
| <i>p</i> -value | 0.565             | 0.083                                   | 0.189                                  | 0.733                                  |

virus (-) =virus negative; virus (+) =virus positive
